# Influence of Adipokines and Ghrelin on Bone Mineral Density and Fracture Risk: A Systematic Review and Meta-Analysis

Emmanuel Biver, Carine Salliot, Christophe Combescure, Laure Gossec, Pierre Hardouin, Isabelle Legroux-Gerot, and Bernard Cortet

Department of Rheumatology (E.B., I.G.L., B.C.), Roger Salengro Hospital, Lille University Hospital, F-59000 Lille, France; EA 4490, Physiopathologie des Maladies Osseuses Inflammatoires (E.B., P.H., I.G.L., B.C.), Univ-Lille Nord de France, F-59000 Lille, France; Paris Descartes University (C.S., L.G.), Medicine Faculty Assistance Publique-Hôpitaux de Paris, Rheumatology B Department, Cochin Hospital, 75014 Paris, France; and Division of Clinical Epidemiology (C.C.), University Hospital of Geneva, 1211 Geneva 14, Switzerland

**Context:** Adipokines (leptin, adiponectin, resistin, visfatin) and ghrelin may be implicated in bone metabolism.

**Objective:** The aim was to perform an overview of the influence of blood levels of adipokines or ghrelin on bone mineral density (BMD), osteoporotic status, and fracture risk in healthy men and women.

**Data Sources:** We reviewed Medline, Embase, and Cochrane databases up to March 2010 and abstracts of international meetings from 2008 to 2009.

**Study Selection:** Fifty-nine studies meeting the inclusion criteria (healthy men or women evaluated for both BMD or fracture risk and at least one adipokine and/or ghrelin levels) were analyzed in the systematic review of the 931 references found in the electronic databases.

**Data Extraction:** We used a predefined extraction sheet.

**Data Synthesis:** We performed meta-analyses using the method of the inverse of the variance estimated pooled correlations between adipokines/ghrelin and BMD. Inverse correlations between adiponectin levels and BMD were highlighted (pooled  $r$  from  $-0.14$  to  $-0.4$ ). Leptin is positively associated to BMD, especially in postmenopausal women (pooled  $r$  from  $0.18$  to  $0.33$ ). High levels of leptin were reported to be predictive of low risk of fractures, whereas high levels of adiponectin may be predictive of high risk of vertebral fractures in men only. No discriminative capacity of osteoporotic status was reported. We found no convincing data to support an association between resistin, visfatin, or ghrelin and BMD.

**Conclusion:** Adiponectin is the most relevant adipokine negatively associated with BMD, independent of gender and menopausal status. Inconsistent associations between adipokines and BMD are probably confounded by body composition, in particular fat mass parameters. (*J Clin Endocrinol Metab* 96: 2703–2713, 2011)

**A**dipose tissue may regulate bone metabolism and be involved in osteoporosis pathophysiology. Epidemiological data have established positive relationships between fat mass and bone mineral density (BMD). Obesity is protective against osteoporosis, whereas low body weight a major risk factor for fractures (1, 2). Fractures are inversely related to body mass index (BMI) in both men and women (3). BMI has a marked effect on 10-yr fracture risk probability evaluated in the FRAX algorithm (4). However, the effect of fat mass on bone remains unclear (5). Although abundant data suggest that adipose tissue protects the skeleton, recent studies provide evidence for an inverse relationship between bone and fat (6, 7). Moreover, a high prevalence (27.7%) of obesity was reported in postmenopausal women presenting a low-trauma fracture (8). Experimental data also support the links between adipose tissue and osteoporosis. An increase in bone marrow adiposity has been reported in osteoporotic patients (9). Adipocytes and osteoblasts share the same mesenchymal stem cell precursors and common hormonal and cytokine regulation factors (10, 11).

Multiple mechanisms seem associated with these links between bone and fat. In addition to the mechanical load supported by fat mass on the skeleton, adipose tissue is considered an endocrine organ. Besides estrogen synthesis in postmenopausal women, adipocytes produce adipokines: leptin, adiponectin, resistin, and visfatin (12, 13). Leptin, produced in bone marrow adipocytes and osteoblastic cells, regulates appetite and weight, osteoblast proliferation and differentiation *in vitro* (14–16), and osteoclasts (14, 17, 18). Its receptor is expressed in osteoblasts (14, 19). Leptin also affects bone through its actions on the central nervous system, in particular the hypothalamus (20, 21). Adiponectin, exclusively expressed by adipocytes, circulates in much higher concentrations than other adipocyte products. It is inversely related to visceral fat mass and BMI (22) and regulates metabolism and inflammatory pathways (23). It appears to exert a negative effect on bone mass (24, 25). Adiponectin receptors have been identified on both osteoblasts and osteoclasts (26, 27). Resistin has rarely been found to be expressed by adipocytes (28), but is expressed by bone marrow and peripheral mononuclear cells (29). It acts as an inflammatory cytokine in the atherogenic process. Visfatin is highly expressed in visceral fat and up-regulated in obesity and type 2 diabetes mellitus (30). Thus, in addition to the regulation of food intake and energy metabolism, adipokines seem to be implicated in the control of bone biology and remodeling.

Furthermore, ghrelin is a GH secretagogue synthesized predominantly in epithelial cells of the stomach. It has been reported to increase fat mass by stimulating appetite

and reducing fat use. Serum ghrelin levels are inversely correlated with weight and fat mass in postmenopausal women (31). Because GH secretagogue receptors have been identified on osteoblastic bone cells, ghrelin may play a role in bone metabolism and mediate feeding effects on fat and bone (32, 33).

Thus, levels of adipokines and ghrelin may influence bone metabolism. The clinical relevance of plasma levels of adipokines or ghrelin, as a marker of bone health in healthy patients, remains unclear. The aim of this review was to obtain an overview of the influence of plasma levels of adipokines or ghrelin on BMD and fracture risk in healthy men and women.

## Materials and Methods

### Search strategy

The search was performed in electronic databases (Medline, Embase, Cochrane) and abstracts of international meetings held from 2008 to 2009 (the American Society for Bone and Mineral Research and The Endocrine Society). The electronic database search was last updated on March 30, 2010, and was conducted using the following keyword combinations: (“Adipokines”{tw} OR “leptin”{tw} OR “adiponectin”{tw} OR “resistin”{tw} OR “visfatin”{tw} OR “Ghrelin”{tw}) AND (“Bone Density”{tw} OR “Osteoporosis”{tw} OR “Absorptiometry”{tw} OR “Fractures”{tw})). Articles were selected on the basis of the abstracts, before examining the full text. Articles not in English, German, French, or Spanish were excluded. The reviewers were not blinded to the journal, authors, or institution of the publications because this has been shown to be unnecessary (34).

### Inclusion criteria

Articles were eligible if they reported the results of original transversal or longitudinal studies on the association of adipokines and/or ghrelin levels and BMD and/or fractures. Only studies including healthy men or women who were evaluated for both BMD or fracture risk and at least one serum adipokine and/or ghrelin levels assessment were selected. We excluded studies with patients aged less than 18 yr, patients with comorbidities or obesity, patients receiving metabolism medications (calcium and vitamin D excluded), and studies that focused on patients with high physical activities. The analysis focused on the BMD of lumbar spine, hip (femoral neck and total hip), distal and mid-shaft radius, and total body, measured by dual x-ray absorptiometry. BMD had to be expressed as a continuous variable in grams per square centimeter or T-score (*i.e.* SD compared with the mean value of BMD in a population of young adult women) or a categorical variable, such as osteoporosis defined by a T-score of  $-2.5$  or below, osteopenia defined by a T-score between  $-2.5$  and  $-1$ , and normal BMD defined by a T-score above  $-1$ . Vertebral and nonvertebral fractures were assessed on self-report or by spine radiographs.

### Data extraction

Data extraction was performed by one reviewer (E.B.) on the full texts using a predefined extraction sheet available from the

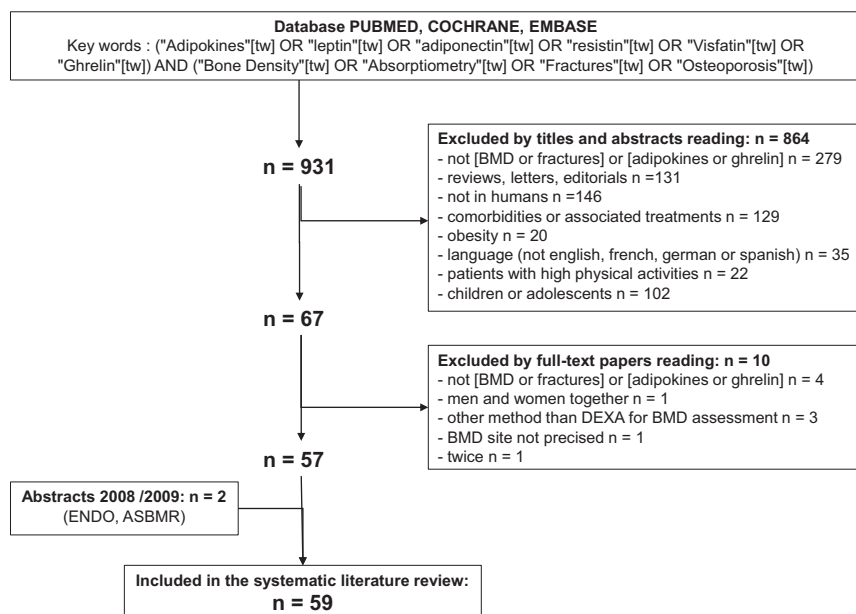

FIG. 1. Systematic literature search selection process (flow-chart).

authors. These data included patients' characteristics (mean age, gender, ethnicity), osteoporotic status, BMI, total percentage fat, total fat of participants, number of patients, adipokine or ghrelin assessment (dosage conditions, methods, units), BMD assessment (site, method, units), and fractures (site and method of diagnosis: self-report or radiographs). Mean data with measures of dispersion and correlations between adipokines/ghrelin levels and BMD with adjustment factors were collected (if available).

### Quality assessment of studies

To assess the quality of publication, we examined patient inclusion criteria as well as the quality of the reporting. Articles were excluded if definitions of outcomes (BMD, osteoporotic status, or fractures) were unclear.

### Statistical analysis

Data were recorded for each study as means  $\pm$  SD or percentages. To accommodate differences in the ways in which adipokine levels were measured and reported in various studies, the absolute adipokine levels were converted into a common unit by calculating weighted-effect sizes. These sizes were derived by dividing the mean difference of adipokine levels in osteoporotic and nonosteoporotic groups of each study by its SD (standardized mean difference).

We performed two types of meta-analyses. For each, heterogeneity was tested with the Cochran Q statistic and measured with the  $I^2$  statistics. A random-effect model was used to take into account within-study and between-study variance.

First, a meta-analysis of unadjusted correlations between adipokine or ghrelin levels and BMD was performed using the method of the inverse of the variance (a Fisher's z-transformation was applied on the correlation coefficients), according to gender and menopausal status, as it was planned *a priori*. The results were expressed in correlation coefficient  $r$  with 95% confidence intervals (CI) and  $P$  value (if  $<0.05$ , indicated statistical signif-

icance). This statistical analysis was performed with the software S-Plus 8.0 for Windows (Insightful Corp., Seattle, WA).

Second, when data were available, we performed a meta-analysis pooling the mean differences of hormone levels according to osteoporotic status. RevMan 5.0.18 software (Nordic Cochrane Centre, Copenhagen, Denmark) was used to calculate the pooled standardized mean difference for continuous outcomes (method of the inverse of the variance).

To examine the possibility of publication bias, we conducted funnel plots and quantified the bias using the Egger's test of the intercept. We also estimated the adjusted pooled correlations after imputing missing studies using Duval and Tweedie's trim and fill procedure. These analyses were performed in meta-analyses including at least 10 studies, using the Comprehensive Meta Analysis 2 computer program (CMA Biostat, Englewood, NJ).

## Results

### Selection and characteristics of included studies

The review process is summarized in Fig. 1. Using our search strategy, we found 931 citations, of which 864 were excluded by reading titles or abstracts. We excluded studies assessing patients with comorbidities: metabolic diseases (diabetes, obesity, gastric bypass, chronic renal disease), anorexia nervosa, inflammatory rheumatism (rheumatoid arthritis, spondyloarthropathy), endocrine diseases (Cushing's disease, acromegaly), and chronic obstructive pulmonary disease; animal studies; and studies focusing on athletic patients. Thus, 67 articles were full-text reviewed, and 57 of these met the inclusion criteria and had data available for at least one of the outcomes (35–91). Two recent abstracts from an international congress were also included (92, 93). Most of the studies were cross-sectional studies; only three provided longitudinal data (72, 74, 77), and eight compared adipokine levels according to osteoporosis status (41, 53, 66, 68, 73, 78, 90, 92). Pooling of studies for correlation analyses resulted in a combined sample size of 10,451 patients (1867 premenopausal women, 4213 postmenopausal women, and 4371 men) across 38 studies. The mean age of participants was 37 yr (range, 29.4–45.2) in premenopausal women, 65.3 yr (range, 49.9–77.7) in postmenopausal women, and 49.1 yr (range, 18.9–71.9) in men (data available for eight of 10, 26 of 29, and 13 of 16 studies, respectively). Ethnicity of participants was not reported in a majority of studies; 13 studies concerned Asiatic patients. Only seven

**TABLE 1.** Pooled correlations between adipokine/ghrelin and BMD according to gender and menopausal status using random-effect meta-analyses (35–70)

| Adipokine/<br>ghrelin | BMD sites    | Men             |                 |                  |                       |                 |              |                | Premenopausal women |                 |                  |
|-----------------------|--------------|-----------------|-----------------|------------------|-----------------------|-----------------|--------------|----------------|---------------------|-----------------|------------------|
|                       |              | Studies (Refs.) | No. of patients | <i>P</i> Cochran | <i>I</i> <sup>2</sup> | Pooled <i>r</i> | 95% CI       | <i>P</i> value | Studies (Refs.)     | No. of patients | <i>P</i> Cochran |
| Leptin                | Lumbar spine | 35–41           | 2005            | <0.001           | 82                    | 0.03            | −0.1, 0.15   | 0.69           | 40, 42–48           | 968             | 0.45             |
|                       | Total hip    | 39–41, 59       | 1030            | 0.17             | 40                    | 0.14            | 0.06, 0.22   | 0.001          | 40, 42, 47          | 435             | 0.75             |
|                       | Femoral neck | 35–38, 41, 59   | 1885            | <0.001           | 81                    | 0.11            | −0.01, 0.24  | 0.08           | 35, 45–48           | 631             | 0.09             |
|                       | Total body   | 37, 39, 59, 62  | 1709            | 0.15             | 43                    | 0.1             | 0.02, 0.17   | 0.01           | 42, 44–46, 48       | 635             | 0.86             |
| Adiponectin           | Lumbar spine | 38, 39, 65–67   | 982             | 0.62             | 0                     | −0.18           | −0.24, −0.12 | <0.001         | 35, 46              | 298             | 0.11             |
|                       | Total hip    | 39, 66, 67      | 810             | 0.08             | 61                    | −0.15           | −0.26, −0.03 | 0.01           | NA                  | NA              | NA               |
|                       | Femoral neck | 38, 65, 66      | 309             | 0.15             | 47                    | −0.15           | −0.3, 0.01   | 0.07           | 43, 46              | 298             | 0.32             |
|                       | Total body   | 39, 66, 67      | 810             | <0.001           | 96                    | −0.4            | −0.66, −0.05 | 0.03           | 46                  | 98              | NA               |
| Resistin              | Lumbar spine | 38, 39          | 312             | 0.1              | 64                    | −0.11           | −0.31, 0.1   | 0.3            | NA                  | NA              | NA               |
| Ghrelin               | Lumbar spine | 38, 66, 69, 70  | 821             | 0.56             | 0                     | −0.05           | −0.12, 0.02  | 0.19           | NA                  | NA              | NA               |
|                       | Total hip    | 66, 69, 70      | 741             | 0.006            | 80                    | 0.05            | −0.15, 0.25  | 0.6            | NA                  | NA              | NA               |
|                       | Femoral neck | 38, 66, 70      | 742             | 0.001            | 85                    | 0.09            | −0.14, 0.31  | 0.45           | NA                  | NA              | NA               |
|                       | Total body   | 66, 69          | 216             | 0.34             | 0                     | 0.13            | −0.01, 0.26  | 0.06           | NA                  | NA              | NA               |

NA, Not applicable.

studies reported fracture data according to adipokine or ghrelin levels.

### Influence of adipokine/ghrelin levels on BMD and osteoporotic status

#### Correlations between adipokine/ghrelin levels and BMD

We performed pooled correlations analyses on all studies according to gender and menopausal status (Table 1).

Leptin appeared positively correlated to BMD at all sites and with the higher pooled correlations in postmenopausal women (pooled *r* from 0.18 to 0.33). In premenopausal women, lower pooled correlations were highlighted only at lumbar spine (*r* = 0.08), total hip (*r* = 0.3), and total body BMD (*r* = 0.22). In men, correlations between leptin and BMD were found only at total hip (*r* = 0.14) and total body (*r* = 0.1) (35–64, 74, 87).

Consistent and inverse correlations were found between circulating adiponectin levels and BMD at lumbar spine, total hip, and total body in postmenopausal women and men (pooled *r* from −0.15 to −0.4) without differences between genders. In premenopausal women, data are much fewer, and negative correlations were identified only at the femoral neck (*r* = −0.14) and total body (*r* = −0.25) (35, 38, 39, 43, 46, 51, 52, 61, 65–68, 81).

No significant correlation was found between resistin or ghrelin and BMD at all sites (38, 39, 51, 66, 69, 70). One study reports the lack of correlations between visfatin and BMD, except for total hip BMD (*r* = 0.175; *P* < 0.05) (39).

Because adjusting adipokines for body weight or BMI commonly reverses the direction of the association found between adipokines and bone density (12), in Table 2 we reported data for both nonadjusted and adjusted correlations for fat mass, BMI, or body weight. Interestingly, the negative correlations between adi-

ponectin and BMD remained significant even after adjusting for fat parameters, whereas the correlations between leptin and BMD rarely did.

We examined the year of publication as a potential source of heterogeneity in the three meta-analyses, including at least 10 studies (correlations between leptin and lumbar spine, femoral neck, and total body BMD in postmenopausal women). The year of publication was not found as a source of heterogeneity (*P* = 0.33, 1, and 0.58, respectively). We also examined the possibility of publication bias in these studies (Supplemental Fig. 1, published on The Endocrine Society's Journals Online web site at <http://jcem.endojournals.org>). We found no publication bias for the correlation between leptin and femoral neck or total body BMD. Concerning the correlation between leptin and lumbar spine BMD, although the Egger's test did not show any evidence for bias (*P* = 0.16), the funnel plot, first without and then with the imputed studies, suggests that smaller studies with lower correlation coefficients are missing, and this is confirmed after the imputation of missing studies (adjusted pooled correlation, 0.1; 95% CI, −0.02 to +0.22).

#### Association between adipokine/ghrelin levels and BMD

The association between adipokine or ghrelin levels and BMD values was evaluated in 28 reports using regression models (Supplemental Tables 1A and 1B) (35, 37–39, 42, 46, 48, 49, 51, 52, 58–62, 65, 67, 69, 70, 72, 74, 76, 78, 82, 87–89, 91).

In univariate analyses, a negative association between adiponectin and BMD was found in men and women, even after adjustment for specific body composition parameters, including BMI, and lifestyle habits (67, 72, 76). In multivariate analyses, five studies showed a negative association between adiponectin and lumbar spine BMD:

**TABLE 1.** Continued

| Premenopausal women |          |              |         | Postmenopausal women                 |                 |           |                |          |              |         |                        |
|---------------------|----------|--------------|---------|--------------------------------------|-----------------|-----------|----------------|----------|--------------|---------|------------------------|
| I <sup>2</sup>      | Pooled r | 95% CI       | P value | Studies (Refs.)                      | No. of patients | P Cochran | I <sup>2</sup> | Pooled r | 95% CI       | P value | P value between groups |
| 0                   | 0.08     | 0.1, 0.14    | 0.02    | 35, 36, 40, 44, 47–58                | 1678            | <0.001    | 85             | 0.18     | 0.06, 0.3    | 0.005   | 0.19                   |
| 0                   | 0.3      | 0.21, 0.38   | <0.001  | 40, 47, 55, 59–61                    | 673             | 0.49      | 0              | 0.33     | 0.26, 0.4    | <0.001  | 0.001                  |
| 50                  | 0.07     | –0.05, 0.18  | 0.25    | 35, 36, 47–49, 51, 54–56, 58, 59, 61 | 1315            | 0.02      | 50             | 0.21     | 0.13, 0.28   | <0.001  | 0.12                   |
| 0                   | 0.22     | 0.14, 0.29   | <0.001  | 44, 48–52, 56, 58, 59, 61, 63, 64    | 993             | <0.001    | 70             | 0.3      | 0.19, 0.41   | <0.001  | 0.005                  |
| 62                  | –0.11    | –0.22, 0.01  | 0.07    | 51, 52, 67, 68                       | 688             | 0.58      | 0              | –0.17    | –0.24, –0.1  | <0.001  | 0.86                   |
| NA                  | NA       | NA           | NA      | 61, 67, 68                           | 598             | 0.19      | 40             | –0.22    | –0.35, –0.09 | 0.001   | 0.4                    |
| 0                   | –0.14    | –0.25, –0.03 | 0.02    | 51, 61                               | 124             | 0.04      | 76             | –0.24    | –0.58, 0.16  | 0.23    | 0.88                   |
| NA                  | –0.25    | NA           | <0.05   | 51, 52, 61, 67                       | 619             | 0.02      | 70             | –0.25    | –0.42, –0.05 | 0.01    | 0.71                   |
| NA                  | NA       | NA           | NA      | NA                                   | NA              | NA        | NA             | NA       | NA           | NA      | NA                     |
| NA                  | NA       | NA           | NA      | 51, 69, 70                           | 581             | 0.19      | 39             | –0.07    | –0.21, 0.06  | 0.29    | 0.72                   |
| NA                  | NA       | NA           | NA      | 69, 70                               | 493             | 0.7       | 0              | –0.04    | –0.12, 0.05  | 0.44    | 0.43                   |
| NA                  | NA       | NA           | NA      | 51, 70                               | 540             | 0.22      | 35             | –0.07    | –0.2, 0.06   | 0.28    | 0.24                   |
| NA                  | NA       | NA           | NA      | 51, 69                               | 129             | 0.42      | 0              | –0.05    | –0.04, 0.17  | 0.55    | 0.1                    |

two studies in postmenopausal women ( $\beta = -0.103, P = 0.048$ ; and  $\beta = -0.005, P = 0.04$ ) (51, 89), two in premenopausal women ( $\beta = -0.01, P = 0.043$ ; and  $\beta = -0.283, P = 0.005$ ) (46, 52), and one in men ( $\beta = -0.163; P = 0.025$ ) (39). For femoral neck BMD, one study found such negative association in postmenopausal women ( $\beta = -0.445; P = 0.007$ ) (61), and one in premenopausal women ( $\beta = -0.01; P = 0.002$ ) (46). Nevertheless, five other studies did not find such associations in lumbar spine or femoral neck in men (65), premenopausal women (78, 89), and postmenopausal women (51).

Results were much more discordant for leptin; in univariate analyses, we found positive and very weak associations with BMD in postmenopausal women, but no longer evident after adjustment for fat mass parameters in half of the reports (67, 88). In multivariable regression models, leptin was rarely identified as an independent predictor of BMD (two of five reports at lumbar spine, one of three at total hip), explaining in positive reports no more than 1 to 7% of the variability of BMD (49, 91). Moreover, when BMI or fat mass parameters were included in the model, most of the time leptin did not explain BMD variability any longer.

Concerning ghrelin, only two studies were available, and they did not show any association with BMD (51, 69), except in one report, and then only for total hip BMD in young women ( $\beta = -0.31; P = 0.033$ ) (69).

Thus, the influence of plasma leptin, adiponectin, and ghrelin levels on BMD values would be very weak and mediated or confounded by the specific body composition parameters.

**Adipokine/ghrelin levels and BMD variations**

The ability of adipokine level to predict BMD variations was evaluated in three cohort studies (72, 74, 77).

Adiponectin was not associated with bone loss after 4 yr of follow-up at all bone sites in a cohort of 264 men and

261 postmenopausal women (72). In men, leptin would be associated with changes in forearm BMD at 4 yr, but not in total hip BMD (74). In another cohort of 35 postmenopausal women, significant associations with BMD variations at 12 months were reported for leptin (with femoral neck and total body BMD) and adiponectin (with lumbar spine BMD). In different predictive models with baseline variables explaining the variance in changes in BMD at 12 months, fat mass and leptin ( $\beta = 0.001$ ) explained 10.2% of the decrease in femoral neck BMD, whereas the trunk fat/leg fat ratio and adiponectin ( $\beta = -0.002$ ) explained 13.1% of the decrease in lumbar spine BMD ( $P < 0.05$ ) (77).

**Comparison of adipokine levels in patients according to osteoporosis status**

Eight papers reported adipokine or ghrelin levels in patients according to their osteoporotic status (41, 53, 66, 68, 73, 78, 90, 92) (Table 3). No significant difference in leptin, adiponectin, or ghrelin levels was observed between osteoporotic and nonosteoporotic patients, except in one report. Pooled data for leptin in women showed a nonsignificant trend for lower levels of leptin in osteoporotic women (standardized mean difference osteoporotic vs. controls,  $-0.76; 95\% \text{ CI}, -1.68 \text{ to } 0.16; I^2 = 91\%; P = 0.11$ ; Supplemental Fig. 2).

Furthermore, another approach using the receiver operating characteristic analysis showed no capability of leptin to differentiate women with normal and decreased BMD (area under curve,  $0.527 \pm 0.029; 95\% \text{ CI}, 0.470-0.585$ ) (79). To our knowledge, such analyses were not performed for other adipokines or ghrelin.

**Adipokine/ghrelin levels and fracture risk**

**Leptin level and prevalent fractures**

The association between leptin and prevalent vertebral fractures diagnosed on lateral spine radiograph was re-

**TABLE 2.** Studies reporting both nonadjusted and adjusted correlations for fat-related parameters (36, 38–40, 59, 61, 62, 65, 66)

|                      | BMD site     | First author, year (Ref.) | No. of patients  | Without adjustment |                    | Adjusted for fat-related parameters |                    |
|----------------------|--------------|---------------------------|------------------|--------------------|--------------------|-------------------------------------|--------------------|
|                      |              |                           |                  | r                  | P value            | r                                   | P value            |
| Men                  |              |                           |                  |                    |                    |                                     |                    |
| Leptin               | Lumbar spine | Thomas, 2001 (40)         | 343              | −0.12              | <0.05              | −0.09 <sup>a</sup>                  | NS                 |
|                      |              | Oh, 2005 (38)             | 80               | −0.08              | 0.489              | −0.24 <sup>b</sup>                  | 0.039              |
|                      |              | Peng, 2008 (39)           | 232              | 0.13               | NS                 | 0.01 <sup>c</sup>                   | NS                 |
|                      |              | Dennison, 2004 (36)       | 219              | 0.27               | <0.001             | 0.10 <sup>d</sup>                   | NS                 |
|                      | Total hip    | Thomas, 2001 (40)         | 343              | 0.05               | NS                 | −0.15 <sup>a</sup>                  | <0.01              |
|                      |              | Peng, 2008 (39)           | 232              | 0.13               | NS                 | 0.05 <sup>c</sup>                   | NS                 |
|                      |              | Zoico, 2003 (59)          | 92               | 0.23               | <0.05              | 0.13 <sup>a</sup>                   | 0.236              |
|                      | Femoral neck | Zoico, 2003 (59)          | 92               | 0.25               | <0.05              | 0.13 <sup>a</sup>                   | 0.21               |
|                      |              | Dennison, 2004 (36)       | 219              | 0.30               | <0.001             | 0.04 <sup>d</sup>                   | NS                 |
|                      | Total body   | Peng, 2008 (39)           | 232              | −0.01              | NS                 | −0.05 <sup>c</sup>                  | NS                 |
| Morberg, 2003 (62)   |              | 317                       | 0.17             | <0.05              | −0.19 <sup>g</sup> | <0.01                               |                    |
| Zoico, 2003 (59)     |              | 92                        | 0.19             | 0.064              | 0.25 <sup>a</sup>  | <0.05                               |                    |
| Adiponectin          | Total hip    | Peng, 2008 (39)           | 232              | −0.26              | <0.05              | −0.14 <sup>c</sup>                  | <0.05              |
|                      | Femoral neck | Basurto, 2009 (65)        | 92               | −0.24              | <0.001             | −0.09 <sup>e</sup>                  | NS                 |
|                      | Total body   | Peng, 2008 (39)           | 232              | −0.21              | <0.05              | −0.15 <sup>c</sup>                  | <0.05              |
| Resistin             | Lumbar spine | Oh, 2005 (38)             | 80               | −0.24              | 0.05               | −0.31 <sup>b</sup>                  | 0.011              |
|                      |              | Peng, 2008 (39)           | 232              | −0.02              | NS                 | 0.01 <sup>c</sup>                   | NS                 |
|                      | Total hip    | Peng, 2008 (39)           | 232              | −0.08              | NS                 | −0.04 <sup>c</sup>                  | NS                 |
|                      | Total body   | Peng, 2008 (39)           | 232              | −0.05              | NS                 | −0.09 <sup>c</sup>                  | NS                 |
| Visfatin             | Lumbar spine | Peng, 2008 (39)           | 232              | 0.08               | NS                 | 0.05 <sup>c</sup>                   | NS                 |
|                      | Total hip    | Peng, 2008 (39)           | 232              | 0.18               | <0.05              | 0.14 <sup>c</sup>                   | NS                 |
|                      | Total body   | Peng, 2008 (39)           | 232              | 0.02               | NS                 | 0.01 <sup>c</sup>                   | NS                 |
| Ghrelin              | Femoral neck | Gonnelli, 2008 (66)       | 137              | 0.25               | <0.01              | 0.20 <sup>f</sup>                   | <0.05              |
| Premenopausal women  |              |                           |                  |                    |                    |                                     |                    |
| Leptin               | Lumbar spine | Thomas, 2001 (40)         | 137              | 0.05               | NS                 | −0.01 <sup>a</sup>                  | NS                 |
|                      | Total hip    | Thomas, 2001 (40)         | 137              | 0.31               | <0.001             | −0.04 <sup>a</sup>                  | NS                 |
| Postmenopausal women |              |                           |                  |                    |                    |                                     |                    |
| Leptin               | Lumbar spine | Thomas, 2001 (40)         | 165              | 0.25               | <0.01              | 0.08 <sup>a</sup>                   | NS                 |
|                      |              | Dennison, 2004 (36)       | 172              | 0.36               | <0.001             | 0.14 <sup>d</sup>                   | NS                 |
|                      | Total hip    | Zoico, 2003 (59)          | 171              | 0.34               | <0.001             | 0.15 <sup>a</sup>                   | <0.05              |
|                      |              | Thomas, 2001 (40)         | 165              | 0.44               | <0.001             | −0.01 <sup>a</sup>                  | NS                 |
|                      | Femoral neck | Zoico, 2003 (59)          | 171              | 0.33               | <0.001             | 0.16 <sup>a</sup>                   | <0.05              |
|                      |              | Dennison, 2004 (36)       | 172              | 0.35               | <0.001             | 0.10 <sup>d</sup>                   | NS                 |
|                      | Total body   | Zoico, 2003 (59)          | 171              | 0.33               | <0.001             | 0.30 <sup>a</sup>                   | <0.001             |
|                      | Adiponectin  | Total hip                 | Zoico, 2008 (61) | 36                 | −0.46              | <0.001                              | −0.36 <sup>a</sup> |
| Femoral neck         |              | Zoico, 2008 (61)          | 36               | −0.45              | <0.001             | −0.36 <sup>a</sup>                  | <0.05              |
| Total body           |              | Zoico, 2008 (61)          | 36               | −0.52              | <0.001             | −0.42 <sup>a</sup>                  | <0.001             |

NS, Not significant.

Adjustment for fat-related parameters: <sup>a</sup> Fat mass; <sup>b</sup> age, BMI; <sup>c</sup> age, fat mass; <sup>d</sup> age, alcohol, tobacco, activities, calcium intake, osteoarthritis, BMI; <sup>e</sup> BMI; <sup>f</sup> age, BMI, calcium intake; <sup>g</sup> body weight.

ported in one study of 139 postmenopausal women (35.3% of the patients presenting vertebral fractures) (58). Plasma leptin levels, but not the percentage of fat mass, were significantly lower in women with vertebral fractures than without ( $P < 0.05$ ). In a multiple logistic regression analysis, leptin contributed to the presence of vertebral fracture with an odds ratio (OR) of 0.642 (95% CI, 0.429–0.960;  $P = 0.031$ ).

According to nonvertebral fractures, three observational studies in patients with hip fractures were available, but they lack a comparative group to assess the involvement of adipokines in peripheral fractures (60, 68, 86).

However, one of these did not suggest any influence of serum leptin on hip fractures in 250 geriatric patients with current hip fracture: 40% of them were in the normal range, 40% had a decreased leptin level, and 20% had a higher leptin level (86). No data were available for ghrelin and other adipokines.

#### Leptin, adiponectin, and incident fractures

The association of adipokines and incident fractures was analyzed in three cohort studies (67, 72, 84).

In a follow-up of 8087 person-years reporting 28 vertebral and five nontraumatic hip fractures, a trend for an

**TABLE 3.** Results of comparisons between adipokines or ghrelin levels and osteoporotic status in eight studies (41, 53, 66, 68, 73, 78, 90, 92)

| First author, year (Ref.) | Population                             | Adipokine or Ghrelin | Osteoporosis    |                   | Osteopenia      |               | Normal BMD      |                   | P value |
|---------------------------|----------------------------------------|----------------------|-----------------|-------------------|-----------------|---------------|-----------------|-------------------|---------|
|                           |                                        |                      | No. of patients | Mean $\pm$ SD     | No. of patients | Mean $\pm$ SD | No. of patients | Mean $\pm$ SD     |         |
| Odabasi, 2000 (53)        | Postmenopausal women                   | Leptin               | 50              | 18.7 $\pm$ 1.78   | NA              | NA            | 30              | 22.35 $\pm$ 2.2   | 0.103   |
| Yilmazi, 2005 (90)        | Postmenopausal women                   | Leptin               | 36              | 17.03 $\pm$ 8.4   | 24              | 16 $\pm$ 7.84 | 30              | 16.55 $\pm$ 8.22  | 0.15    |
| Breuil, 2008 (92)         | Postmenopausal women                   | Leptin               | 20              | 3.71 $\pm$ 1.42   | NA              | NA            | 16              | 6.2 $\pm$ 2.7     | 0.002   |
| Canhao, 2008 (73)         | Women >50 yr                           | Leptin               | 24              | 24.76 $\pm$ 15.06 | NA              | NA            | 40              | 26.56 $\pm$ 14.57 | NS      |
| Kontogianni, 2004 (78)    | Pre and postmenopausal women           | Leptin               | NA              | NA                | NA              | NA            | NA              | NA                | NS      |
| Papadopoulou, 2004 (41)   | Men                                    | Leptin               | 44              | 12.7 $\pm$ 11.2   | NA              | NA            | 319             | 14.1 $\pm$ 12     | NS      |
| Canhao, 2008 (73)         | Men                                    | Leptin               | 10              | 9.72 $\pm$ 7.63   | NA              | NA            | 19              | 9.48 $\pm$ 7.13   | NS      |
| Kontogianni, 2004 (78)    | Pre and postmenopausal women           | Adiponectin          | NA              | NA                | NA              | NA            | NA              | NA                | NS      |
| Ozkurt, 2009 (68)         | Postmenopausal women with hip fracture | Adiponectin          | 37              | 6.99 $\pm$ 0.5    | NA              | NA            | 68              | 6.33 $\pm$ 0.51   | NS      |
| Gonnelli, 2008 (66)       | Men                                    | Adiponectin          | 25              | 10.1 $\pm$ 5.3    | 65              | 10 $\pm$ 3.5  | 47              | 11.3 $\pm$ 3.8    | NS      |
| Gonnelli, 2008 (66)       | Men                                    | Ghrelin              | 25              | 757.5 $\pm$ 92.4  | 65              | 829 $\pm$ 113 | 47              | 853.6 $\pm$ 136.8 | NS      |

NA, Not applicable; NS, not significant ( $P > 0.05$ ).

inverse association between leptin level and fracture was observed, with a relative risk of 0.60 (95% CI, 0.34–1.06) per 1-SD increase of ln-transformed leptin in an age/gender-adjusted model ( $P = 0.08$ ) and 0.64 (95% CI, 0.41–0.99) in a multivariate model adjusting for body weight and a variety of demographic and lifestyle variables ( $P = 0.04$ ). High serum levels of leptin appeared predictive of a lower risk for nontraumatic fractures, independent of body weight (84).

In a 15-yr follow-up cohort of 507 men (age, 71  $\pm$  0.6 yr), 314 patients (61.9%) were treated for fractures (67). No association between adiponectin levels and fractures was highlighted. The hazard ratio for fracture per 1 SD of adiponectin was 0.97 (95% CI, 0.86–1.10, after adjustment for age, weight, height, BMI, waist-to-hip ratio at enrollment, smoking status, physical activity, diabetes mellitus, and insulin resistance).

Finally, the Rancho Bernado Study also evaluated the association between adiponectin (blood sample in 1984–1987) and fractures (incident fractures during 1992–1996) (72). Vertebral fractures were assessed on lateral vertebral radiographs using the qualitative and semiquantitative grading scheme for vertebral deformity (Genant). Results differed according to gender. In men ( $n = 277$ ), 21 vertebral fractures (7.6%) were reported. Adiponectin level was independently but weakly associated with vertebral fractures after adjusting for age, weight, calcium intake, type 2 diabetes, alcohol intake, and exercise (adjusted OR, 1.13; 95% CI, 1.08–1.23;  $P = 0.009$ ). The association was higher in men with baseline adiponectin levels greater than 10 mg/ml compared with men with lower adiponectin levels (adjusted OR, 2.98; 95% CI, 1.08–8.26;  $P = 0.035$ ). Nonvertebral fractures were not assessed. In postmenopausal women ( $n = 251$ ), vertebral fractures were reported in 48 (19.1%) patients and nontraumatic, nonvertebral fractures in 28 (11.1%) patients.

Adiponectin was not associated with vertebral ( $\beta = 0.003$ ;  $P = 0.48$ ) and nonvertebral fractures in linear multivariable regression analyses adjusted for age, weight, calcium intake, type 2 diabetes, alcohol intake, and exercise. The lack of association persisted if considering patients with two or more thoracic or lumbar fractures ( $\beta = 0.004$ ;  $P = 0.10$ ).

## Discussion

We performed a systematic review of the literature, including 59 studies assessing the influence of adipokines or ghrelin on BMD and nontraumatic fractures in healthy men and women. Adiponectin would be the most relevant adipokine negatively associated to BMD and independently of gender, menopausal status, and fat mass parameters. Leptin appears positively correlated to BMD, in particular in postmenopausal women, but probably confounded with fat mass parameters. Adipokines and ghrelin fail to discriminate osteoporosis status. Concerning fracture risk, high levels of leptin would be predictive of low risk of fractures, unlike adiponectin, except maybe in men where high levels of adiponectin may be predictive of high risk of vertebral fractures. Data are lacking according to the value of adiponectin to predict unknown vertebral fractures. No convincing data support an association between resistin, visfatin, or ghrelin and BMD or fractures, although few data are available.

We found high heterogeneity between studies and no consistent difference in the levels of adipokines between nonosteoporotic and osteoporotic patients. To limit variability due to comorbidities or treatments, we voluntarily chose to focus our review on healthy patients, with exclusion of studies with patients receiving bone medication, excluding calcium, vitamin D, and hormone replacement

therapy. We found differences between gender and menopausal status only for the correlations between leptin and total hip and body BMD (Table 1). Identifying other variability and confounding factors was a crucial issue. The pooled data came from observational studies conducted in a variety of populations and ethnic groups. Ethnicity has not been assessable. Adjusting adipokine levels for body composition parameters or age would have been a sensible way of removing some confounding factors or some of the noise from the analyses (12, 94). However, we were unable to adjust the pooled correlations or to conduct subgroup analyses for age or BMI because of the lack of individual data in the original publications that reported age and BMI as mean  $\pm$  SD. Indeed, as was previously discussed, results for the average patient cannot be applied to all patients (95).

Although fat mass may be a confounding factor, adipokines seem to have a proper role of in bone metabolism. These effects are probably both direct and indirect, in particular for leptin through its signaling in the brain (21). Plasma leptin levels, but not fat mass percentage, were significantly lower in women with vertebral fractures (58). Similarly, high levels of leptin appeared predictive of a lower risk for nontraumatic fractures, independent of body weight (84). Many other variables, such as estrogen levels, proinflammatory cytokines (96), and preanalytic variability of adipokine dosage (94, 97, 98) may interfere with adipokines and bone, but these data were not reported in the studies.

The relationship between fat and bone is complex. Many diseases with changes in fat metabolism, such as diabetes mellitus, Cushing's syndrome, and anorexia nervosa, have a severe impact on skeletal health. Despite having low visceral and sc fat depots, women with anorexia nervosa have elevated marrow fat mass, which is inversely associated with BMD. An inverse association between leptin and marrow fat was reported in these patients who exhibit premature conversion of hematopoietic to fat cells in the marrow of the peripheral skeleton (99, 100). Bone marrow adiposity is thus probably a main determinant of the links between adipocytes and bone metabolism. Plasma adipokine levels may imprecisely reflect the levels of adipokines in bone marrow fluids that constitute the bone microenvironment. Pino *et al.* (101) recently reported significant lower levels of leptin but also adiponectin in bone marrow supernatant fluids of osteoporotic patients compared with nonosteoporotic patients, with concentration different enough to discriminate the osteoporotic status. However, peripheral blood levels were not assessed in this study, and it is not possible to determine whether blood levels of adipokines are representative of the bone marrow fluid levels. In this hypothesis, higher

levels of adiponectin would have been expected, according to the negative association between peripheral adiponectin and BMD. Reciprocal relationships between bone marrow adiposity and bone formation are currently under investigation for understanding osteoporosis pathophysiology. The increase in bone marrow adiposity of osteoporotic patients appears to be less an epiphenomenon in response to a decline in bone formation than one of the causes that alters bone metabolism itself (9). Thus, the influence of adipose tissue on bone may be related to mechanical but also metabolic effects that may differ according to fat distribution and the type of adipocytes (white or brown adipose tissue). Circulating adipokine levels, easily assessable, likely reflect the overall adipose tissue metabolism.

In conclusion, evidence from our meta-analyses shows that adipokines influence bone metabolism differently. Adiponectin displays the highest negative association with BMD, independent of fat mass or BMI. The relevance of serum adipokine levels to reflect bone marrow microenvironment and adiposity and its impact on osteoporosis outcome still need to be investigated in longitudinal studies.

## Acknowledgments

The authors thank Mrs. Guillemette Utard from the Paris Medicine University Library and Dr. Frederic Banal for assistance in the literature search and Pr. Maxime Dougados for workshop participation.

Address all correspondence and requests for reprints to: Dr. Emmanuel Biver, Department of Rheumatology, Roger Salengro Hospital, University Hospital of Lille, Rue Emile Laine, 59037 Lille Cedex, France. E-mail: ebiver@yahoo.fr.

Abbott France gave an unrestricted grant to support a meta-analysis methods workshop but played no further role in the project.

Disclosure Summary: The authors have nothing to declare.

## References

1. Reid IR 2002 Relationships among body mass, its components, and bone. *Bone* 31:547–555
2. Reid IR 2008 Relationships between fat and bone. *Osteoporos Int* 19:595–606
3. De Laet C, Kanis JA, Odén A, Johanson H, Johnell O, Delmas P, Eisman JA, Kroger H, Fujiwara S, Garnero P, McCloskey EV, Mellstrom D, Melton 3rd LJ, Meunier PJ, Pols HA, Reeve J, Silman A, Tenenhouse A 2005 Body mass index as a predictor of fracture risk: a meta-analysis. *Osteoporos Int* 16:1330–1338
4. Kanis JA, Johnell O, Oden A, Johansson H, McCloskey E 2008 FRAX and the assessment of fracture probability in men and women from the UK. *Osteoporos Int* 19:385–397
5. Zhao LJ, Jiang H, Papiasian CJ, Maulik D, Drees B, Hamilton J,



- Deng HW 2008 Correlation of obesity and osteoporosis: effect of fat mass on the determination of osteoporosis. *J Bone Miner Res* 23:17–29
6. von Muhlen D, Safii S, Jassal SK, Svartberg J, Barrett-Connor E 2007 Associations between the metabolic syndrome and bone health in older men and women: the Rancho Bernardo Study. *Osteoporos Int* 18:1337–1344
  7. Hsu YH, Venners SA, Terwedow HA, Feng Y, Niu T, Li Z, Laird N, Brain JD, Cummings SR, Bouxsein ML, Rosen CJ, Xu X 2006 Relation of body composition, fat mass, and serum lipids to osteoporotic fractures and bone mineral density in Chinese men and women. *Am J Clin Nutr* 83:146–154
  8. Premaor MO, Pilbrow L, Tonkin C, Parker RA, Compston J 2010 Obesity and fractures in postmenopausal women. *J Bone Miner Res* 25:292–297
  9. Rosen CJ, Bouxsein ML 2006 Mechanisms of disease: is osteoporosis the obesity of bone? *Nat Clin Pract Rheumatol* 2:35–43
  10. Rodríguez JP, Astudillo P, Ríos S, Pino AM 2008 Involvement of adipogenic potential of human bone marrow mesenchymal stem cells (MSCs) in osteoporosis. *Curr Stem Cell Res Ther* 3:208–218
  11. Duque G 2008 Bone and fat connection in aging bone. *Curr Opin Rheumatol* 20:429–434
  12. Reid I, Richards J 2009 Adipokine effects on bone. *Clin Rev Bone Miner Metab* 7:240–248
  13. Schäffler A, Müller-Ladner U, Schölmerich J, Büchler C 2006 Role of adipose tissue as an inflammatory organ in human diseases. *Endocr Rev* 27:449–467
  14. Cornish J, Callon KE, Bava U, Lin C, Naot D, Hill BL, Grey AB, Broom N, Myers DE, Nicholson GC, Reid IR 2002 Leptin directly regulates bone cell function in vitro and reduces bone fragility in vivo. *J Endocrinol* 175:405–415
  15. Thomas T, Gori F, Khosla S, Jensen MD, Burguera B, Riggs BL 1999 Leptin acts on human marrow stromal cells to enhance differentiation to osteoblasts and to inhibit differentiation to adipocytes. *Endocrinology* 140:1630–1638
  16. Gordeladze JO, Drevon CA, Syversen U, Reseland JE 2002 Leptin stimulates human osteoblastic cell proliferation, de novo collagen synthesis, and mineralization: impact on differentiation markers, apoptosis, and osteoclastic signaling. *J Cell Biochem* 85:825–836
  17. Holloway WR, Collier FM, Aitken CJ, Myers DE, Hodge JM, Malakellis M, Gough TJ, Collier GR, Nicholson GC 2002 Leptin inhibits osteoclast generation. *J Bone Miner Res* 17:200–209
  18. Burguera B, Hofbauer LC, Thomas T, Gori F, Evans GL, Khosla S, Riggs BL, Turner RT 2001 Leptin reduces ovariectomy-induced bone loss in rats. *Endocrinology* 142:3546–3553
  19. Morroni M, De Matteis R, Palumbo C, Ferretti M, Villa I, Rubinacci A, Cinti S, Marotti G 2004 In vivo leptin expression in cartilage and bone cells of growing rats and adult humans. *J Anat* 205:291–296
  20. Ducy P, Amling M, Takeda S, Priemel M, Schilling AF, Beil FT, Shen J, Vinson C, Rueger JM, Karsenty G 2000 Leptin inhibits bone formation through a hypothalamic relay: a central control of bone mass. *Cell* 100:197–207
  21. Elefteriou F, Ahn JD, Takeda S, Starbuck M, Yang X, Liu X, Kondo H, Richards WG, Bannan TW, Noda M, Clement K, Vaisse C, Karsenty G 2005 Leptin regulation of bone resorption by the sympathetic nervous system and CART. *Nature* 434:514–520
  22. Arita Y, Kihara S, Ouchi N, Takahashi M, Maeda K, Miyagawa J, Hotta K, Shimomura I, Nakamura T, Miyaoka K, Kuriyama H, Nishida M, Yamashita S, Okubo K, Matsubara K, Muraguchi M, Ohmoto Y, Funahashi T, Matsuzawa Y 1999 Paradoxical decrease of an adipose-specific protein, adiponectin, in obesity. *Biochem Biophys Res Commun* 257:79–83
  23. Ouchi N, Walsh K 2007 Adiponectin as an anti-inflammatory factor. *Clin Chim Acta* 380:24–30
  24. Oshima K, Nampe A, Matsuda M, Iwaki M, Fukuhara A, Hashimoto J, Yoshikawa H, Shimomura I 2005 Adiponectin increases bone mass by suppressing osteoclast and activating osteoblast. *Biochem Biophys Res Commun* 331:520–526
  25. Yamaguchi N, Kukita T, Li YJ, Martinez Argueta JG, Saito T, Hanazawa S, Yamashita Y 2007 Adiponectin inhibits osteoclast formation stimulated by lipopolysaccharide from *Actinobacillus actinomycetemcomitans*. *FEMS Immunol Med Microbiol* 49:28–34
  26. Shinoda Y, Yamaguchi M, Ogata N, Akune T, Kubota N, Yamachi T, Terauchi Y, Kadowaki T, Takeuchi Y, Fukumoto S, Ikeda T, Hoshi K, Chung UI, Nakamura K, Kawaguchi H 2006 Regulation of bone formation by adiponectin through autocrine/paracrine and endocrine pathways. *J Cell Biochem* 99:196–208
  27. Berner HS, Lyngstadaas SP, Spahr A, Monjo M, Thommesen L, Drevon CA, Syversen U, Reseland JE 2004 Adiponectin and its receptors are expressed in bone-forming cells. *Bone* 35:842–849
  28. Fain JN, Cheema PS, Bahouth SW, Lloyd Hiler M 2003 Resistin release by human adipose tissue explants in primary culture. *Biochem Biophys Res Commun* 300:674–678
  29. Patel L, Buckels AC, Kinghorn IJ, Murdock PR, Holbrook JD, Plumpton C, Macphee CH, Smith SA 2003 Resistin is expressed in human macrophages and directly regulated by PPAR  $\gamma$  activators. *Biochem Biophys Res Commun* 300:472–476
  30. Xie H, Tang SY, Luo XH, Huang J, Cui RR, Yuan LQ, Zhou HD, Wu XP, Liao EY 2007 Insulin-like effects of visfatin on human osteoblasts. *Calcif Tissue Int* 80:201–210
  31. Iwamoto I, Yoshimitsu N, Fujino T, Douchi T 2005 Menopausal status influences the relationship between serum ghrelin levels and fat mass in healthy women. *J Endocrinol Invest* 28:405–409
  32. Nikolopoulos D, Theocharis S, Kouraklis G 2010 Ghrelin, another factor affecting bone metabolism. *Med Sci Monit* 16:RA147–RA162
  33. van der Velde M, Delhanty P, van der Eerden B, van der Lely AJ, van Leeuwen J 2008 Ghrelin and bone. *Vitam Horm* 77:239–258
  34. Berlin JA 1997 Does blinding of readers affect the results of meta-analyses? University of Pennsylvania Meta-analysis Blinding Study Group. *Lancet* 350:185–186
  35. Chanprasertyotin S, Piaseu N, Chailurkit L, Rajatanavin R, Ongphiphadhanakul B 2005 Association of circulating leptin with bone mineral density in males and females. *J Med Assoc Thai* 88:655–659
  36. Dennison EM, Syddall HE, Fall CH, Javaid MK, Arden NK, Phillips DI, Cooper C 2004 Plasma leptin concentration and change in bone density among elderly men and women: the Hertfordshire Cohort Study. *Calcif Tissue Int* 74:401–406
  37. Lorentzon M, Landin K, Mellström D, Ohlsson C 2006 Leptin is a negative independent predictor of areal BMD and cortical bone size in young adult Swedish men. *J Bone Miner Res* 21:1871–1878
  38. Oh KW, Lee WY, Rhee EJ, Baek KH, Yoon KH, Kang MI, Yun EJ, Park CY, Ihm SH, Choi MG, Yoo HJ, Park SW 2005 The relationship between serum resistin, leptin, adiponectin, ghrelin levels and bone mineral density in middle-aged men. *Clin Endocrinol (Oxf)* 63:131–138
  39. Peng XD, Xie H, Zhao Q, Wu XP, Sun ZQ, Liao EY 2008 Relationships between serum adiponectin, leptin, resistin, visfatin levels and bone mineral density, and bone biochemical markers in Chinese men. *Clin Chim Acta* 387:31–35
  40. Thomas T, Burguera B, Melton 3rd LJ, Atkinson EJ, O'Fallon WM, Riggs BL, Khosla S 2001 Role of serum leptin, insulin, and estrogen levels as potential mediators of the relationship between fat mass and bone mineral density in men versus women. *Bone* 29:114–120
  41. Papadopoulou F, Krassas GE, Kalothetou C, Koliakos G, Constantinidis TC 2004 Serum leptin values in relation to bone density and growth hormone-insulin like growth factors axis in healthy men. *Arch Androl* 50:97–103
  42. Blum M, Harris SS, Must A, Naumova EN, Phillips SM, Rand WM, Dawson-Hughes B 2003 Leptin, body composition and bone

- mineral density in premenopausal women. *Calcif Tissue Int* 73:27–32
43. Chanprasertyothin S, Saetung S, Payattikul P, Rajatanavin R, Ongphiphadhanakul B 2006 Relationship of body composition and circulatory adiponectin to bone mineral density in young premenopausal women. *J Med Assoc Thai* 89:1579–1583
  44. Iwamoto I, Douchi T, Kosha S, Murakami M, Fujino T, Nagata Y 2000 Relationships between serum leptin level and regional bone mineral density, bone metabolic markers in healthy women. *Acta Obstet Gynecol Scand* 79:1060–1064
  45. Jürimäe J, Jürimäe T 2006 Influence of insulin-like growth factor-1 and leptin on bone mineral content in healthy premenopausal women. *Exp Biol Med (Maywood)* 231:1673–1677
  46. Jürimäe J, Jürimäe T 2007 Adiponectin is a predictor of bone mineral density in middle-aged premenopausal women. *Osteoporos Int* 18:1253–1259
  47. Kim SM, Kim SH, Lee JR, Jee BC, Ku SY, Suh CS, Choi YM, Kim JG, Moon SY 2008 Association of leptin receptor polymorphisms Lys109Arg and Gln223Arg with serum leptin profile and bone mineral density in Korean women. *Am J Obstet Gynecol* 198:421.e1–8
  48. Pasco JA, Henry MJ, Kotowicz MA, Collier GR, Ball MJ, Ugoni AM, Nicholson GC 2001 Serum leptin levels are associated with bone mass in nonobese women. *J Clin Endocrinol Metab* 86:1884–1887
  49. Blain H, Vuillemin A, Guillemin F, Durant R, Hanesse B, de Lance N, Doucet B, Jeandel C 2002 Serum leptin level is a predictor of bone mineral density in postmenopausal women. *J Clin Endocrinol Metab* 87:1030–1035
  50. Di Carlo C, Tommaselli GA, Di Spiezio Sardo A, Sammartino A, Attianese W, Gargano V, Bifulco G, Nappi C 2007 Longitudinal evaluation of serum leptin and bone mineral density in early postmenopausal women. *Menopause* 14:450–454
  51. Jürimäe J, Jürimäe T, Leppik A, Kums T 2008 The influence of ghrelin, adiponectin, and leptin on bone mineral density in healthy postmenopausal women. *J Bone Miner Metab* 26:618–623
  52. Jürimäe J, Rembel K, Jürimäe T, Rehand M 2005 Adiponectin is associated with bone mineral density in perimenopausal women. *Horm Metab Res* 37:297–302
  53. Odabağcı E, Ozata M, Turan M, Bingöl N, Yönel A, Cakir B, Kutlu M, Ozdemir IC 2000 Plasma leptin concentrations in postmenopausal women with osteoporosis. *Eur J Endocrinol* 142:170–173
  54. Oguz S, Tapisiz OL, Aytan H, Gunyeli I, Erdem S, Tuncay G, Bilge U, Mollamahmutoglu L 2009 Is leptin a significant predictor of bone mineral density in postmenopausal Turkish women? *Rheumatol Int* 29:393–396
  55. Roux C, Arabi A, Porcher R, Garnero P 2003 Serum leptin as a determinant of bone resorption in healthy postmenopausal women. *Bone* 33:847–852
  56. Sahin G, Polat G, Baethi S, Milcan A, Baethdatoethlu O, Erdethan C, Camdeviren H 2003 Body composition, bone mineral density, and circulating leptin levels in postmenopausal Turkish women. *Rheumatol Int* 23:87–91
  57. Ushiroyama T, Ikeda A, Hosotani T, Higashiyama T, Ueki M 2003 Inverse correlation between serum leptin concentration and vertebral bone density in postmenopausal women. *Gynecol Endocrinol* 17:31–36
  58. Yamauchi M, Sugimoto T, Yamaguchi T, Nakaoka D, Kanzawa M, Yano S, Ozuru R, Sugishita T, Chihara K 2001 Plasma leptin concentrations are associated with bone mineral density and the presence of vertebral fractures in postmenopausal women. *Clin Endocrinol (Oxf)* 55:341–347
  59. Zoico E, Zamboni M, Adami S, Vettor R, Mazzali G, Tosoni P, Bissoli L, Bosello O 2003 Relationship between leptin levels and bone mineral density in the elderly. *Clin Endocrinol (Oxf)* 59:97–103
  60. Di Monaco M, Vallero F, Di Monaco R, Mautino F, Cavanna A 2003 Fat body mass, leptin and femur bone mineral density in hip-fractured women. *J Endocrinol Invest* 26:1180–1185
  61. Zoico E, Zamboni M, Di Francesco V, Mazzali G, Fantin F, De Pergola G, Zivelonghi A, Adami S, Bosello O 2008 Relation between adiponectin and bone mineral density in elderly postmenopausal women: role of body composition, leptin, insulin resistance, and dehydroepiandrosterone sulfate. *J Endocrinol Invest* 31:297–302
  62. Morberg CM, Tetens I, Black E, Toubro S, Soerensen TI, Pedersen O, Astrup A 2003 Leptin and bone mineral density: a cross-sectional study in obese and nonobese men. *J Clin Endocrinol Metab* 88:5795–5800
  63. Goulding A, Taylor RW 1998 Plasma leptin values in relation to bone mass and density and to dynamic biochemical markers of bone resorption and formation in postmenopausal women. *Calcif Tissue Int* 63:456–458
  64. Martini G, Valenti R, Giovani S, Franci B, Campagna S, Nuti R 2001 Influence of insulin-like growth factor-1 and leptin on bone mass in healthy postmenopausal women. *Bone* 28:113–117
  65. Basurto L, Galván R, Cordova N, Saucedo R, Vargas C, Campos S, Halley E, Avelar F, Zárate A 2009 Adiponectin is associated with low bone mineral density in elderly men. *Eur J Endocrinol* 160:289–293
  66. Gonnelli S, Caffarelli C, Del Santo K, Cadirni A, Guerriero C, Lucani B, Franci B, Nuti R 2008 The relationship of ghrelin and adiponectin with bone mineral density and bone turnover markers in elderly men. *Calcif Tissue Int* 83:55–60
  67. Michaëlsson K, Lind L, Frystyk J, Flyvbjerg A, Gedeberg R, Berne C, Zethelius B, Mallmin H, Söderberg S, Melhus H 2008 Serum adiponectin in elderly men does not correlate with fracture risk. *J Clin Endocrinol Metab* 93:4041–4047
  68. Ozkurt B, Ozkurt ZN, Altay M, Aktekin CN, Cađlayan O, Tabak Y 2009 The relationship between serum adiponectin level and anthropometry, bone mass, osteoporotic fracture risk in postmenopausal women. *Ekleml Hastalik Cerrahisi* 20:78–84
  69. Makovey J, Naganathan V, Seibel M, Sambrook P 2007 Gender differences in plasma ghrelin and its relations to body composition and bone—an opposite-sex twin study. *Clin Endocrinol (Oxf)* 66:530–537
  70. Weiss LA, Langenberg C, Barrett-Connor E 2006 Ghrelin and bone: is there an association in older adults?: the Rancho Bernardo study. *J Bone Miner Res* 21:752–757
  71. Ađbaht K, Gürelek A, Karakaya J, Bayraktar M 2009 Circulating adiponectin represents a biomarker of the association between adiposity and bone mineral density. *Endocrine* 35:371–379
  72. Araneta MR, von Mühlen D, Barrett-Connor E 2009 Sex differences in the association between adiponectin and BMD, bone loss, and fractures: the Rancho Bernardo study. *J Bone Miner Res* 24:2016–2022
  73. Canhao H, Fonseca JE, Caetano-Lopes J, Saldanha C, Queiroz MV 2008 Assessment of laboratory measurements and -308 TNF $\alpha$  gene promoter polymorphisms in normal bone mineral density. *Clin Rheumatol* 27:301–307
  74. Crabbe P, Goemaere S, Zmierzczak H, Van Pottelbergh I, De Bacquer D, Kaufman JM 2006 Are serum leptin and the Gln223Arg polymorphism of the leptin receptor determinants of bone homeostasis in elderly men? *Eur J Endocrinol* 154:707–714
  75. Jiang LS, Zhang ZM, Jiang SD, Chen WH, Dai LY 2008 Differential bone metabolism between postmenopausal women with osteoarthritis and osteoporosis. *J Bone Miner Res* 23:475–483
  76. Jürimäe J, Jürimäe T 2007 Plasma adiponectin concentration in healthy pre- and postmenopausal women: relationship with body composition, bone mineral, and metabolic variables. *Am J Physiol Endocrinol Metab* 293:E42–E47
  77. Jürimäe J, Kums T, Jürimäe T 2009 Adipocytokine and ghrelin levels in relation to bone mineral density in physically active older women: longitudinal associations. *Eur J Endocrinol* 160:381–385
  78. Kontogianni MD, Dafni UG, Routsias JG, Skopouli FN 2004

- Blood leptin and adiponectin as possible mediators of the relation between fat mass and BMD in perimenopausal women. *J Bone Miner Res* 19:546–551
79. Liu JM, Zhao HY, Ning G, Chen Y, Zhang LZ, Sun LH, Zhao YJ, Xu MY, Chen JL 2008 IGF-1 as an early marker for low bone mass or osteoporosis in premenopausal and postmenopausal women. *J Bone Miner Metab* 26:159–164
  80. Rauch F, Blum WF, Klein K, Alolio B, Schönau E 1998 Does leptin have an effect on bone in adult women? *Calcif Tissue Int* 63:453–455
  81. Richards JB, Valdes AM, Burling K, Perks UC, Spector TD 2007 Serum adiponectin and bone mineral density in women. *J Clin Endocrinol Metab* 92:1517–1523
  82. Ruhl CE, Everhart JE 2002 Relationship of serum leptin concentration with bone mineral density in the United States population. *J Bone Miner Res* 17:1896–1903
  83. Scariano JK, Garry PJ, Montoya GD, Chandani AK, Wilson JM, Baumgartner RN 2003 Serum leptin levels, bone mineral density and osteoblast alkaline phosphatase activity in elderly men and women. *Mech Ageing Dev* 124:281–286
  84. Schett G, Kiechl S, Bonora E, Redlich K, Woloszczuk W, Oberhollenzer F, Jocher J, Dorizzi R, Muggeo M, Smolen J, Willeit J 2004 Serum leptin level and the risk of nontraumatic fracture. *Am J Med* 117:952–956
  85. Shaarawy M, Abassi AF, Hassan H, Salem ME 2003 Relationship between serum leptin concentrations and bone mineral density as well as biochemical markers of bone turnover in women with postmenopausal osteoporosis. *Fertil Steril* 79:919–924
  86. Shabat S, Nyska M, Eintacht S, Lis M, Bogomolni A, Berner Y, Kestanbaum-Shainkin R 2009 Serum leptin level in geriatric patients with hip fractures: possible correlation to biochemical parameters of bone remodeling. *Arch Gerontol Geriatr* 48:250–253
  87. Sun AJ, Jing T, Heymsfield SB, Phillips GB 2003 Relationship of leptin and sex hormones to bone mineral density in men. *Acta Diabetol* 40(Suppl 1):S101–S105
  88. Weiss LA, Barrett-Connor E, von Mühlen D, Clark P 2006 Leptin predicts BMD and bone resorption in older women but not older men: the Rancho Bernardo study. *J Bone Miner Res* 21:758–764
  89. Wu N, Wang QP, Li H, Wu XP, Sun ZQ, Luo XH 2010 Relationships between serum adiponectin, leptin concentrations and bone mineral density, and bone biochemical markers in Chinese women. *Clin Chim Acta* 411:771–775
  90. Yilmazi M, Kele I, Aydin G, Orkun S, Bayram M, Sevinc FC, Kisa U, Yetkin I 2005 Plasma leptin concentrations in postmenopausal women with osteoporosis. *Endocr Res* 31:133–138
  91. Zhong N, Wu XP, Xu ZR, Wang AH, Luo XH, Cao XZ, Xie H, Shan PF, Liao EY 2005 Relationship of serum leptin with age, body weight, body mass index, and bone mineral density in healthy mainland Chinese women. *Clin Chim Acta* 351:161–168
  92. Breuil V, Amri E, Testa J, Roux CH, Ferrari P, Albert-Sabonnadière C, Elabd C, Ailhaud G, Dani C, Carle Gf, Euler-Ziegler L 2008 Central control of bone remodeling: the neurohypophysial hormone oxytocin is decreased in severe post-menopausal osteoporosis. Proc 30th Annual Meeting of the American Society for Bone and Mineral Research, Montreal, Quebec, Canada, 2008 (Abstract)
  93. Silha JV, Leslie WD 2009 Adiponectin and leptin are the only adipokines strongly associated with bone mineral density in pre- and postmenopausal women. Program of the 91st Annual Meeting of The Endocrine Society, Washington, D.C., 2009 (Abstract P2-14)
  94. Considine RV, Sinha MK, Heiman ML, Kriauciunas A, Stephens TW, Nyce MR, Ohannesian JP, Marco CC, McKee LJ, Bauer TL, Caro JF 1996 Serum immunoreactive-leptin concentrations in normal-weight and obese humans. *N Engl J Med* 334:292–295
  95. Schmid CH, Stark PC, Berlin JA, Landais P, Lau J 2004 Meta-regression detected associations between heterogeneous treatment effects and study-level, but not patient-level, factors. *J Clin Epidemiol* 57:683–697
  96. Kawai M, Rosen CJ 2010 Bone: adiposity and bone accrual—still an established paradigm? *Nat Rev Endocrinol* 6:63–64
  97. Heptulla R, Smitten A, Teague B, Tamborlane WV, Ma YZ, Caprio S 2001 Temporal patterns of circulating leptin levels in lean and obese adolescents: relationships to insulin, growth hormone, and free fatty acids rhythmicity. *J Clin Endocrinol Metab* 86:90–96
  98. Havel PJ, Kasim-Karakas S, Dubuc GR, Mueller W, Phinney SD 1996 Gender differences in plasma leptin concentrations. *Nat Med* 2:949–950
  99. Ecklund K, Vajapeyam S, Feldman HA, Buzney CD, Mulkern RV, Kleinman PK, Rosen CJ, Gordon CM 2010 Bone marrow changes in adolescent girls with anorexia nervosa. *J Bone Miner Res* 25:298–304
  100. Fazeli PK, Bredella MA, Misra M, Meenaghan E, Rosen CJ, Clemmons DR, Breggia A, Miller KK, Klibanski A 2010 Preadipocyte factor-1 is associated with marrow adiposity and bone mineral density in women with anorexia nervosa. *J Clin Endocrinol Metab* 95:407–413
  101. Pino AM, Ríos S, Astudillo P, Fernández M, Figueroa P, Seitz G, Rodríguez JP 2010 Concentration of adipogenic and proinflammatory cytokines in the bone marrow supernatant fluid of osteoporotic women. *J Bone Miner Res* 25:492–498
